# Supplementary material
Source: publisher figshare collection journal article supplement (https://acs.figshare.com/ndownloader/files/14116091)
Supplement: Supplementary file 1 [file 14116091]

# **Fabrication of Microcapsules by the Combination of Biomass Porous Carbon and Polydopamine for Dual Self-Healing Hydrogels**

Shumin Liu, Zhilu Rao, Ruiyue Wu, Zhixiang Sun, Zhiru Yuan, Liangjiu Bai\*, Wenxiang Wang\*, Huawei Yang, Hou Chen

School of Chemistry and Materials Science, Ludong University, Key Laboratory of High Performance and Functional Polymers in the Universities of Shandong Province, Collaborative Innovation Center of Shandong Province for High Performance Fibers and Their Composites, Yantai 264025, China

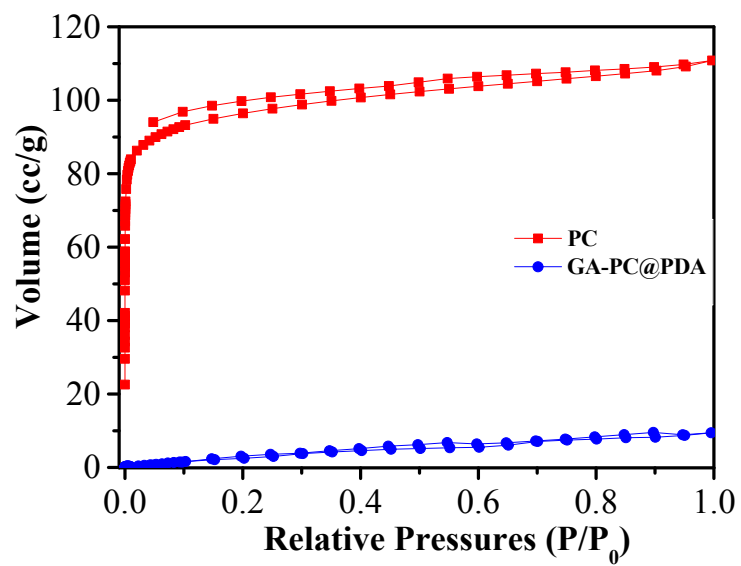

**Figure S1.** BET nitrogen adsorption/desorption isotherms of PC and PC-GA@PDA.

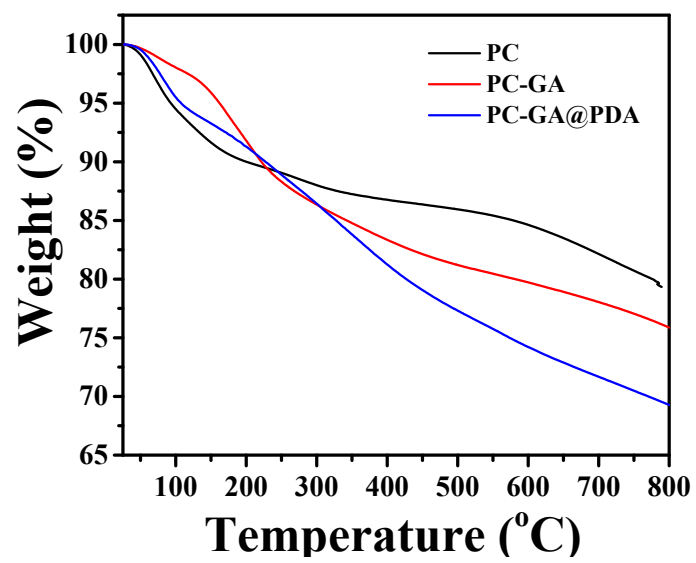

**Figure S2.** TGA data of pristine PC, PC-GA and GA-PC@PDA from 25 °C to 800 °C with the heating rate of 10 °C/min.

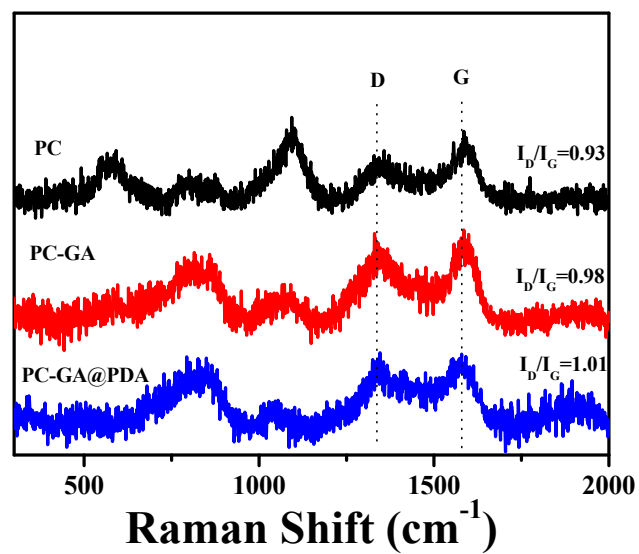

**Figure S3.** Raman spectra of PC, PC-GA, and GA-PC@PDA.
